# Supplementary material
Source: Elsevier journal article supplement (https://www.sciencedirect.com/science/article/pii/S0212656716305698)
Supplement: mmc1 [file S0212656716305698:mmc1.doc]

**Supplementary Table 1** Characteristics of the participants in the cohort following eCPG implementation to eCPG implementation (period 2011-2012) according to whether the GP was an eCPG user or non-user

|  | **Assigned GP** | |  |
| --- | --- | --- | --- |
| **Women** | **Non-user**  **N=51206** | **User**  **N=32806** | **p-value** |
| Age, mean (SD) | 60 (12) | 60 (11) | <0.001 |
| Smoker, n (%) | 3045 (13.7) | 2796 (14.7) | 0.005 |
| Myocardial infarction (registry), n (%) | 476 (2.8) | 335 (1.9) | <0.001 |
| Stroke (registry), n (%) | 1292 (2.5) | 714 (2.2) | 0.001 |
| Intermittent claudication (registry), n (%) | 876 (1.7) | 504 (1.5) | 0.056 |
| Hypertension prevalence, n (%) | 354 (0.7) | 202 (0.6) | 0.202 |
| Hypertension control (<140/90 mmHg), n (%)* | 24820 (48.5) | 14740 (44.9) | <0.001 |
| Type 2 diabetes mellitus prevalence, n (%) | 16336 (66.2) | 10659 (72.3) | <0.001 |
| Type 2 diabetes mellitus control (Hba1c <7.5), n (%)† | 7069 (13.8) | 4446 (13.6) | 0.304 |
| Hypercholesterolemia prevalence, n (%) | 3349 (67.1) | 2871 (67.9) | 0.398 |
| Coronary risk ≥10%, n (%) | 25990 (50.8) | 16095 (49.1) | <0.001 |
| Hypercholesterolemia control in secondary prevention (LDL cholesterol <100 mg/dl), n (%) | 543 (45.2) | 514 (47.2) | 0.316 |
| Diagnosis or treatment for hypertension, type 2 diabetes mellitus or hypercholesterolemia |  |  | <0.001 |
| 1 risk factor | 17859 (34.9) | 11115 (33.9) |  |
| 2 risk factors | 13869 (27.1) | 7940 (24.2) |  |
| 3 risk factors | 4094 (8.0) | 2762 (8.4) |  |
| **Men** | **Non-user**  **N=40152** | **User**  **N=25416** | **p-value** |
| Age, mean (SD) | 61 (11) | 60 (11) | <0.001 |
| Smoker, n (%) | 4307 (24.5) | 3585 (22.7) | <0.001 |
| Myocardial infarction (registry), n (%) | 1887 (12.8) | 1781 (11.9) | 0.021 |
| Stroke (registry), n (%) | 3439 (8.6) | 2193 (8.6) | 0.788 |
| Intermittent claudication (registry), n (%) | 1305 (3.3) | 762 (3.0) | 0.076 |
| Hypertension prevalence, n (%) | 1140 (2.8) | 744 (2.9) | 0.526 |
| Hypertension control (<140/90 mmHg), n (%)* | 22869 (57.0) | 13934 (54.8) | <0.001 |
| Type 2 diabetes mellitus prevalence, n (%) | 14450 (60.4%) | 9813 (70.4%) | <0.001 |
| Type 2 diabetes mellitus control (Hba1c <7.5), n (%)† | 8818 (22.0) | 5767 (22.7) | 0.029 |
| Hypercholesterolemia prevalence, n (%) | 4220 (67.1%) | 3732 (67.6%) | 0.645 |
| Coronary risk ≥10%, n (%) | 22588 (56.3) | 14545 (57.2) | 0.015 |
| Hypercholesterolemia control in secondary prevention (LDL cholesterol <100 mg/dl), n (%) | 1799 (60.7%) | 1738 (61.3%) | 0.677 |
| Diagnosis or treatment for hypertension, type 2 diabetes mellitus or hypercholesterolemia |  |  | <0.001 |
| 1 risk factor | 14095 (35.1) | 8250 (32.5) |  |
| 2 risk factors | 12686 (31.6) | 7667 (30.2) |  |
| 3 risk factors | 4936 (12.3) | 3554 (14.0) |  |

*Individuals with diagnosis or treatment of hypertension

†Individuals with diagnosis or treatment of type 2 diabetes mellitus

GP. General practitioner.; LDL, low-density lipoprotein; SD, standard deviation

**Supplementary Table 2** Registry of eCPG variables post-intervention

|  | **Assigned GP** | |  |
| --- | --- | --- | --- |
| **Women** | **Non-users**  **N=80623** | **Users**  **N=47204** | **p-value** |
| High coronary risk registry, n (%) | 104 (0.2) | 268 (0.8) | <0.001 |
| Diabetes risk registry, n (%) | 514 (1.0) | 362 (1.1) | 0.186 |
| Proteinuria registry, n (%) | 65 (0.1) | 60 (0.2) | 0.050 |
| Secondary prevention registry, n (%) | 139 (0.3) | 587 (1.8) | <0.001 |
| **Men** | **Non-users**  **N=67274** | **Users**  **N=39567** | **p-value** |
| High coronary risk registry, n (%) | 195 (0.5) | 644 (2.5) | <0.001 |
| Diabetes risk registry, n (%) | 462 (1.2) | 385 (1.6) | <0.001 |
| Proteinuria registry, n (%) | 120 (0.3) | 137 (0.5) | <0.001 |
| Secondary prevention registry, n (%) | 268 (0.7) | 1382 (5.4) | <0.001 |

GP. General practitioner.
